# Supplementary material for: Evaluation of the dispersion of metakaolin–graphene oxide hybrid in water and cement pore solution: can metakaolin really improve the dispersion of graphene oxide in the calcium-rich environment of hydrating cement matrix?
Source: Royal Society of Chemistry journal article supplement (doi:10.1039/d1ra01504d), 2021-01-01
Supplement: d1ra01504d1.pdf [file d1ra01504d1.pdf]

## Electronic supplementary information (ESI)

### **Evaluation of the dispersion of metakaolin-graphene oxide hybrid in water and cement pore solution: Can metakaolin really improve the dispersion of graphene oxide in the calcium-rich environment of hydrating cement matrix?**

**Kasra Amini<sup>1</sup>, Siavash Soleimani Amiri<sup>1</sup>, Ali Ghasemi<sup>1</sup>, Sajjad Mirvalad<sup>2\*</sup>, Asghar Habibnejad Korayem<sup>3\*</sup>**

<sup>1</sup> *MSc student, School of Civil Engineering, Iran University of Science and Technology, Tehran, Iran*

<sup>2</sup> *Assistant Professor, School of Civil Engineering, Iran University of Science and Technology, Tehran, Iran*

<sup>3</sup> *Associate Professor, School of Civil Engineering, Iran University of Science and Technology, Tehran, Iran*

\* *Corresponding authors: Email: [mirvalad@iust.ac.ir](mailto:mirvalad@iust.ac.ir), and [ahkorayem@iust.ac.ir](mailto:ahkorayem@iust.ac.ir)*

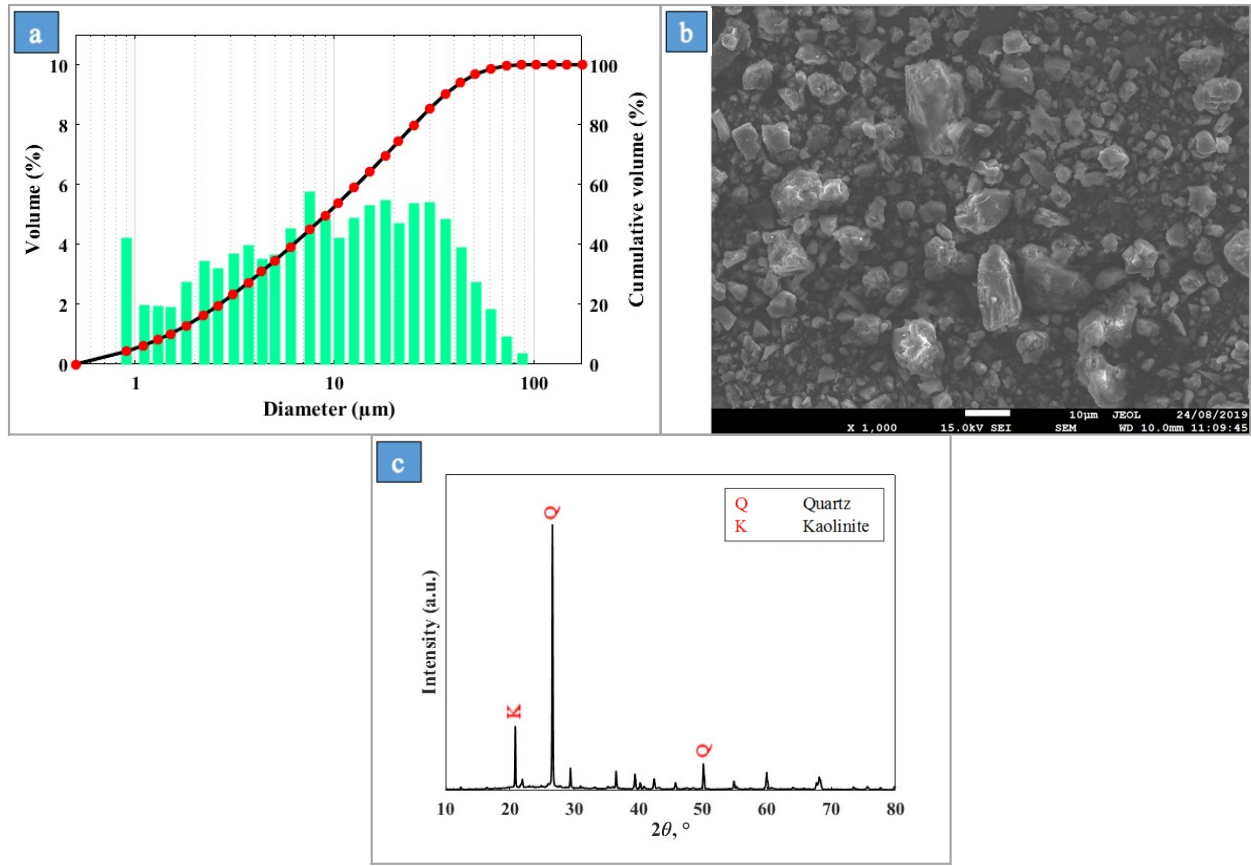

**Fig. S1.** (a) Particle size distribution (b) SEM image and (c) XRD pattern of metakaolin solid particles.

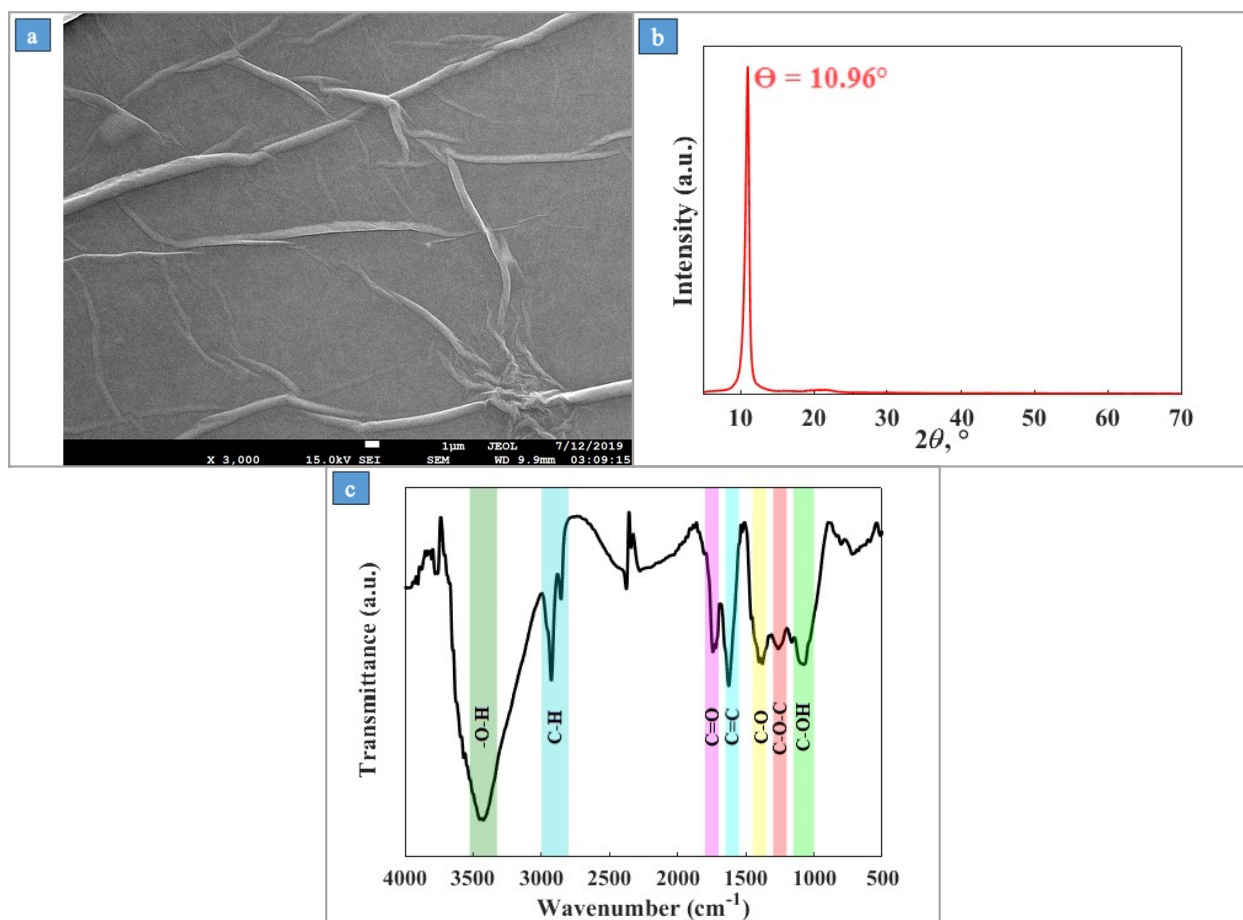

**Fig. S2.** Characterization of as-received GO (a) SEM micrograph (b) XRD pattern and (c) FTIR spectrum.

**Table S1**

The mix design of the prepared SCPS.

| Used chemical (g/l)                  |                     |       |      |
|--------------------------------------|---------------------|-------|------|
| CaSO <sub>4</sub> .2H <sub>2</sub> O | Ca(OH) <sub>2</sub> | KOH   | NaOH |
| 27.55                                | Saturated           | 22.44 | 8.00 |

**Table S2**

The result of ICP-OES analysis of SCPS.

| Elemental concentration (ppm) |        |        |     |      |
|-------------------------------|--------|--------|-----|------|
| K                             | Na     | Ca     | Si  | Fe   |
| 7518.8                        | 3943.4 | 780.05 | 1.6 | 0.01 |

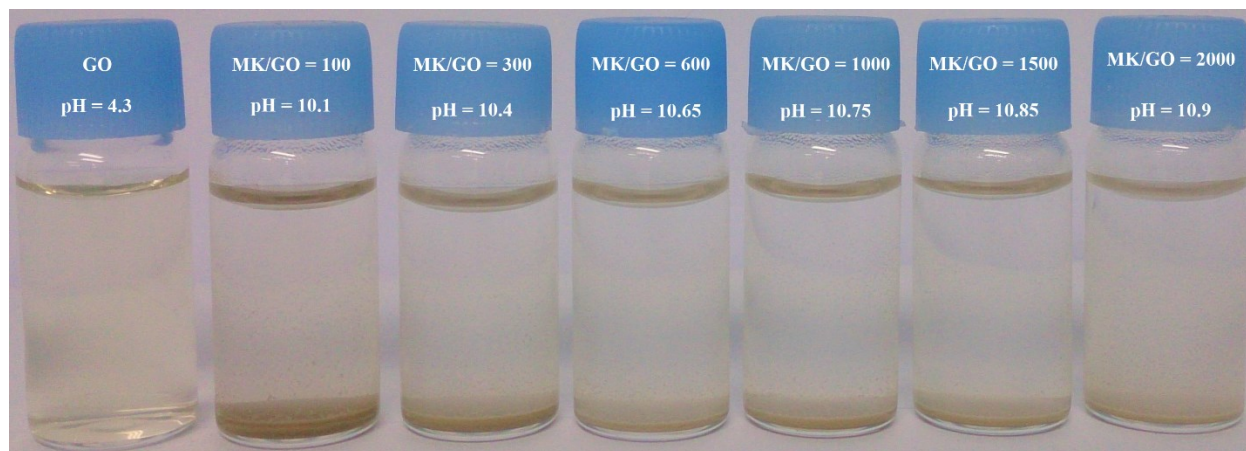

**Fig. S3.** Visual investigation of GO and MK-GO suspensions in water.

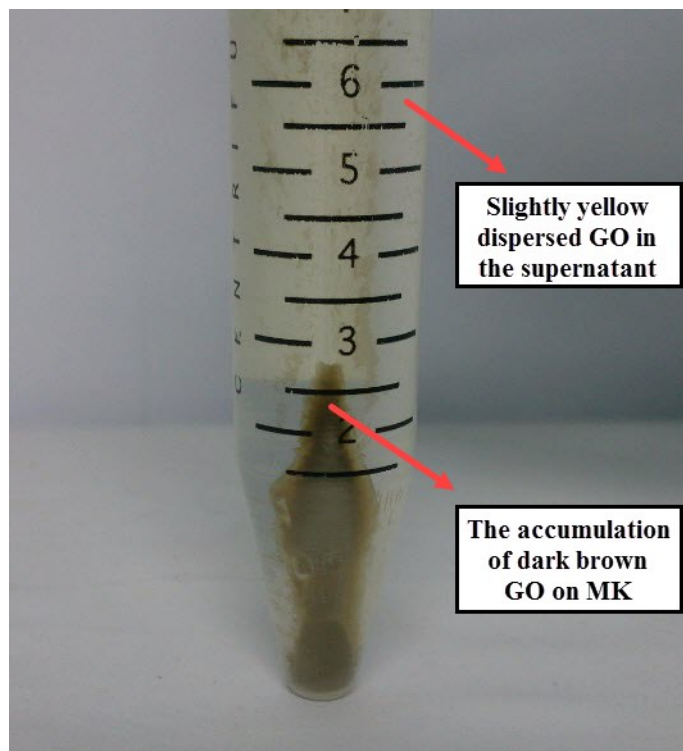

**Fig. S4.** Two-phase system of MK-GO suspension due to the centrifuging treatment, prior to the UV-vis characterization.

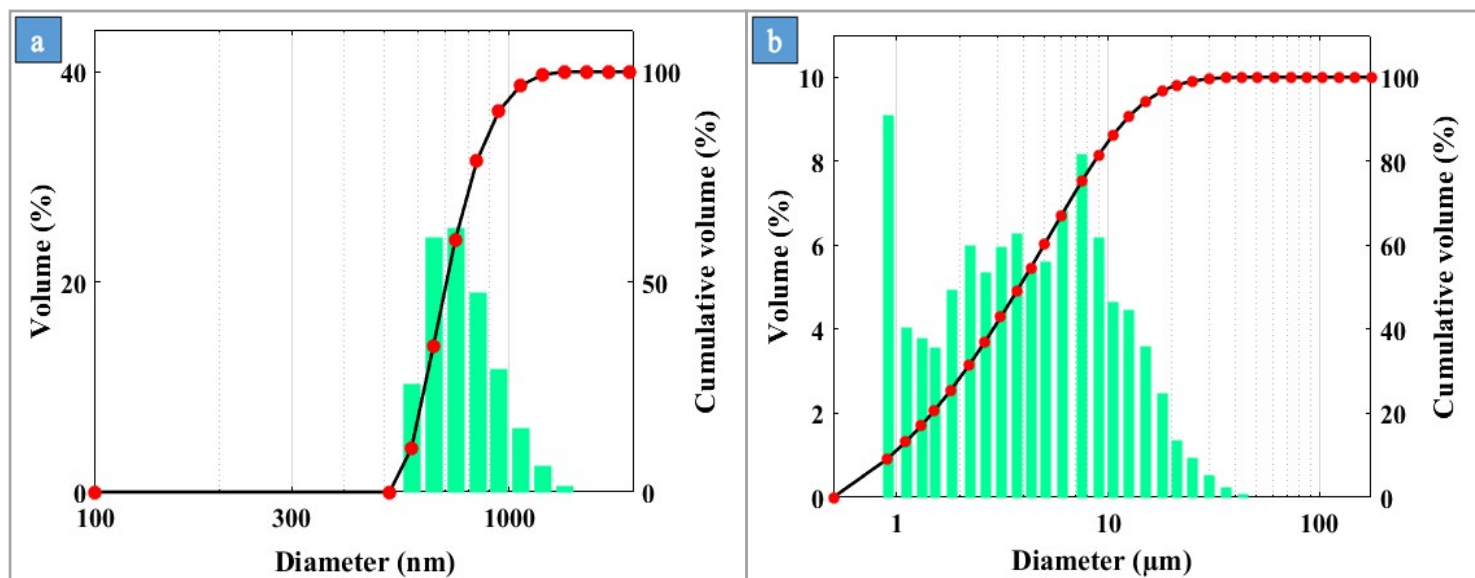

Fig. S5. Particle size distribution of (a) GO suspension and (b) MK suspension in water.

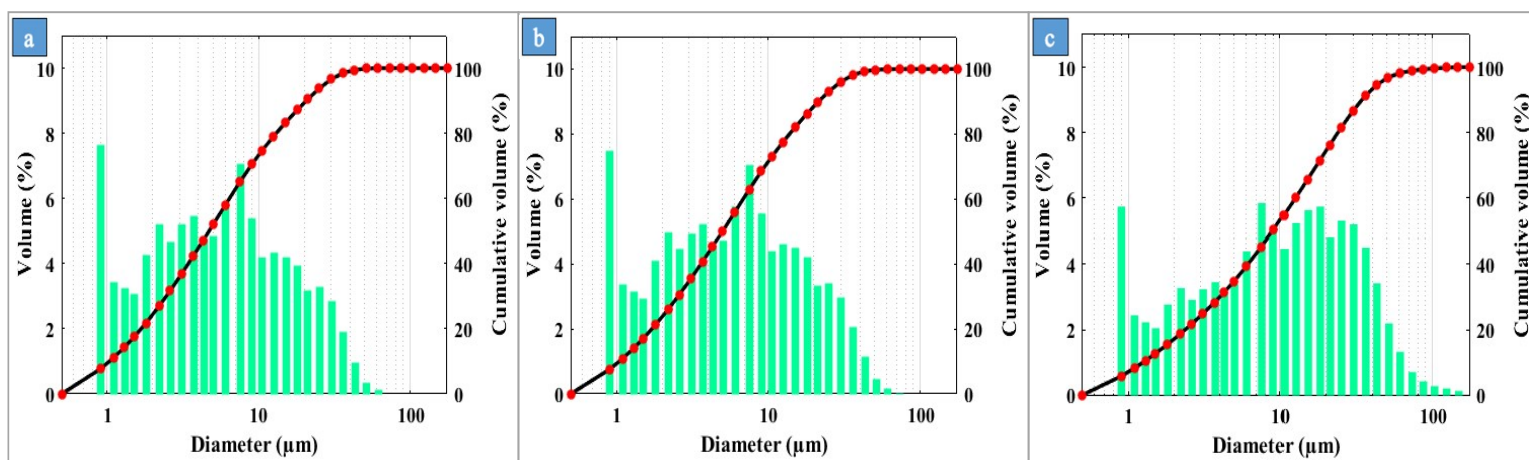

Fig. S6. Particle size distribution of MK-GO suspensions with different MK/GO weight ratios (a) MK/GO = 100 (b) MK/GO = 600 and (c) MK/GO = 1500 in water.

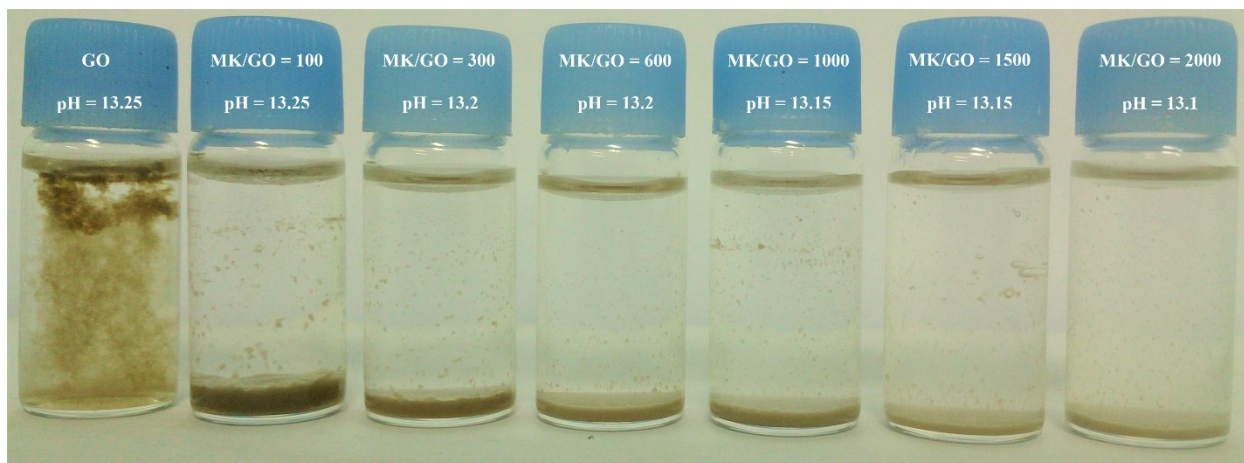

Fig. S7. Visual investigation of GO and MK-GO suspensions in SCPS.

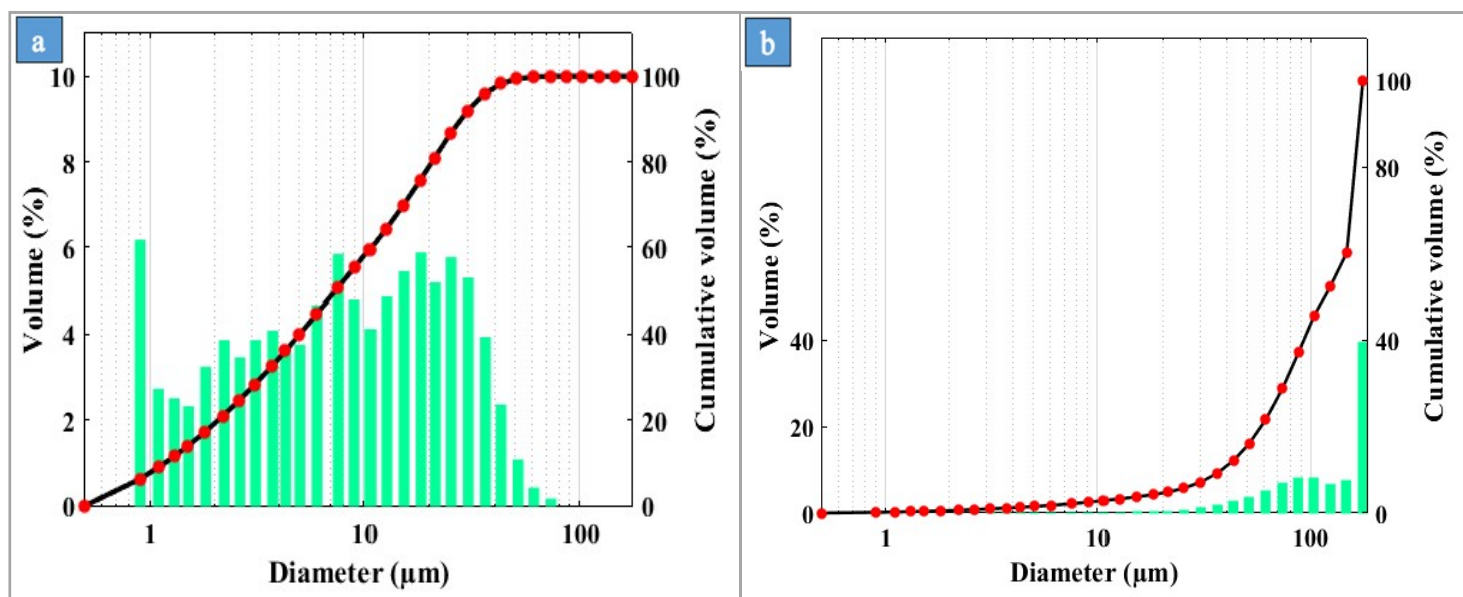

Fig. S8. Particle size distribution of (a) MK suspension and (b) GO suspension in SCPS.

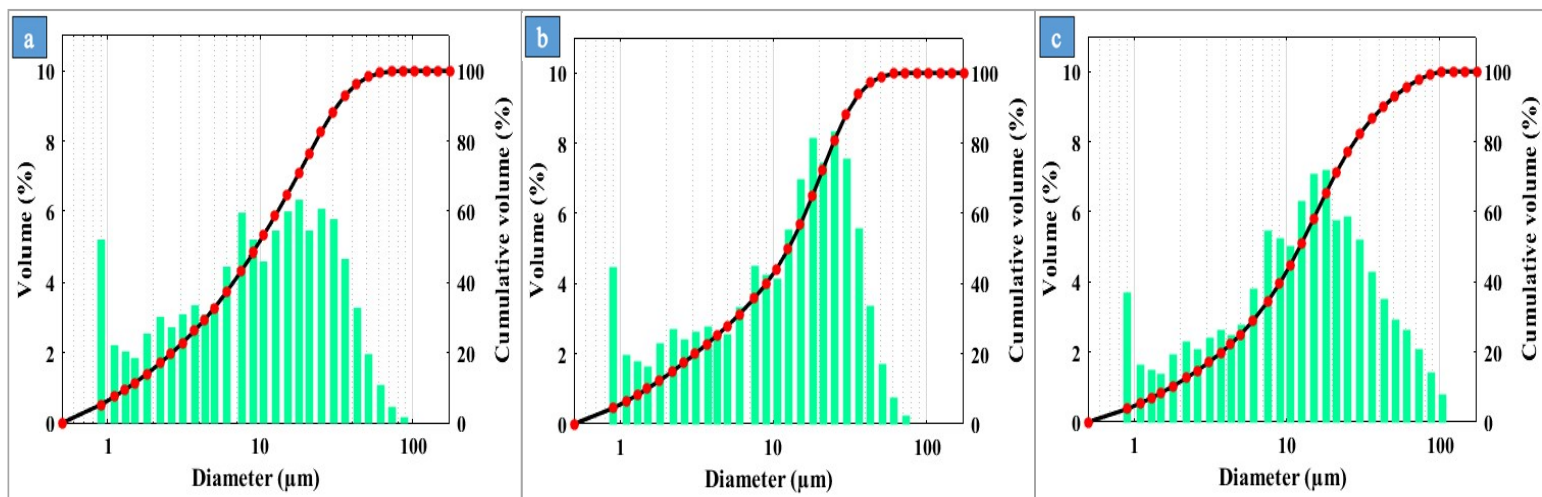

**Fig. S9.** Particle size distribution of MK-GO suspensions with different MK/GO weight ratios (a) MK/GO = 100 (b) MK/GO = 600 and (c) MK/GO = 1500 in SCPS.
